# Supplementary material for: Efficacy and safety of vedolizumab and infliximab treatment for immune-mediated diarrhea and colitis in patients with cancer: a two-center observational study
Source: HighWire-hosted journal article supplement (doi:10.1136/jitc-2021-003277), 2021-11-01

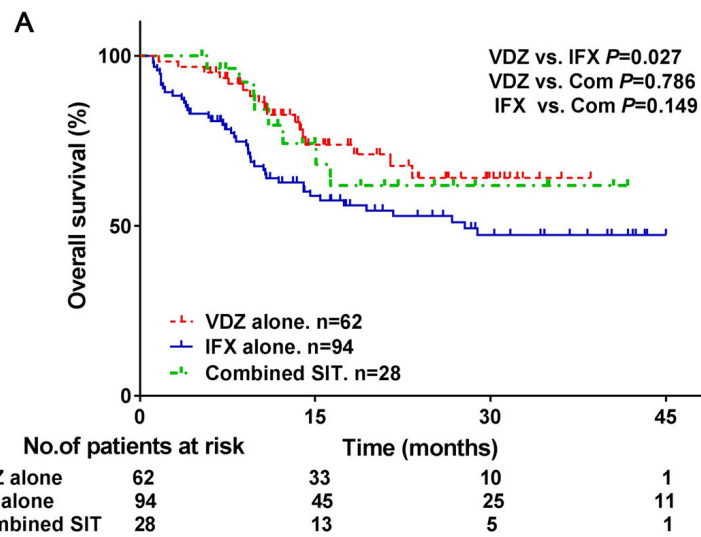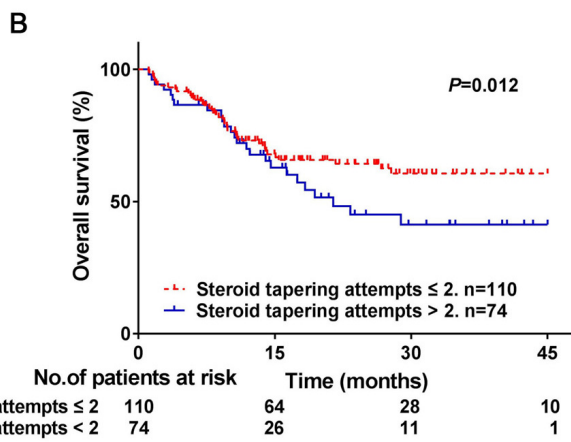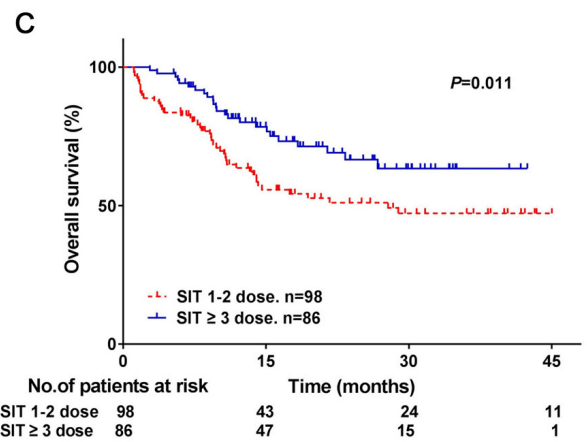

Supplement: jitc-2021-003277supp004_data_supplement.pdf [file jitc-2021-003277supp004_data_supplement.pdf]
